## Blue petrels recognize the odor of their egg

Sarah LECLAIRE<sup>1,2,\*</sup>, Vincent BOURRET<sup>1</sup> & Francesco BONADONNA<sup>1</sup>

<sup>1</sup>Centre d'Ecologie Fonctionnelle et Evolutive, CNRS, UMR 5175, 1919 rte de Mende, Montpellier, France

<sup>2</sup>Laboratoire Evolution & Diversité Biologique, CNRS UMR 5174, 118 rte de Narbonne, 31062 Toulouse, France

\*Corresponding author: [sarah.leclaire@free.fr](mailto:sarah.leclaire@free.fr)

**Key words:** Egg, smell, birds, petrels

### Summary statement

Behavioral choice tests reveal that blue petrels can recognize their own egg from a conspecific egg using odor cues.

## Abstract

Most studies on avian olfactory communication have focused on mate choice, and the importance of olfaction in subsequent nesting stages has been poorly explored. In particular, the role of olfactory cues in egg recognition has received little attention, despite eggs potentially being spread with parental odorous secretions known to elicit individual discrimination. Here we used behavioral choice tests to determine whether female blue petrels (*Halobaena caerulea*) can discriminate the odor of their own egg from the odor of a conspecific egg. Females preferentially approached the odor of their own egg, suggesting that blue petrels can recognize their own egg using odor cues. This finding raises the question of the adaptive value of this mechanism, and may inspire further research on odor-based egg discrimination in species suffering brood parasitism.

## Introduction

Compared to visual and acoustic cues, the role of olfactory cues in avian behavior has long been neglected. In the last decade however, birds have been shown to use odor cues to communicate with their conspecifics (review in Caro et al., 2015). For instance, spotless starlings (*Sturnus unicolor*) recognize the sex of conspecifics (Amo et al., 2012a), Antarctic prions (*Pachyptila desolata*) are attracted to their mate's odor (Bonadonna and Nevitt, 2004) and mallard (*Anas platyrhynchos*) and chicken (*Gallus gallus domesticus*) males with experimentally reduced olfaction have altered sexual behavior (Balthazart and Schoffeniels, 1979; Hirao et al., 2009). However, most studies on avian olfactory communication have focused on mate choice (e.g., Amo et al., 2012b; Caspers et al., 2015; Leclaire et al., 2014; Whittaker et al., 2013), and whether olfaction is critical in subsequent nesting stages has been poorly investigated.

Brood parasitism is widespread in diverse taxa including birds (review in Rohwer and Freeman, 1989; Yom-Tov, 2001), and may have led to the evolution of hosts adopting defenses based on egg recognition and rejection of the parasite egg (Rothstein, 1990). Most studies on egg recognition have investigated the role of visual cues (Soler and Møller, 1996; Spottiswoode and Stevens, 2010), while the role of olfactory cues has received little attention. Eggs however vary in odor, which can be emitted by the developing embryo itself (Webster et al., 2015) or from substances that are transferred onto the egg surface during incubation. In birds, individual odors are thought to originate mainly from preen gland secretions (Mardon et al., 2011) that are spread onto the plumage during preening. These secretions encode information on bird species, identity, sex and kinship (Leclaire et al., 2012; Mardon et al., 2010; Whittaker et al., 2010), and can be transferred from the parent to the egg through passive or active spreading (Martín-Vivaldi et al., 2014). Because in several avian species individuals assess preen oil odor to discriminate between conspecifics (Amo et al., 2012a; Coffin et al., 2011; Whittaker et al., 2011), they could also be able to discriminate their own eggs from other eggs using olfactory cues. This has been shown in zebra finches (*Taeniopygia guttata*), where females are able to discriminate between their own eggs and a conspecific egg based on olfactory cues alone (Golüke et al., 2016). There is also one example of interspecific odor-based egg discrimination in dark-eyed juncos (*Junco hyemalis*), where females spend less time incubating their eggs when spread with the preen oil of a male from another passerine species (Whittaker et al., 2009). More studies examining egg odor recognition in birds may however shed additional light on the potential role of olfaction in regulating parental care in birds, and indicate how widespread this ability is across the phylum.

Here we study egg-odor recognition in the blue petrel (*Halobaena caerulea*), a species with a particularly good sense of smell, where individuals are known to recognize their own odor, the odor of their partner (Mardon and Bonadonna, 2009) and the odor of their nest (Bonadonna et al., 2004). As eggs are likely to smell a mixture of the odor of the incubating parents, the nest environment, and possibly the developing embryo, we expect blue petrels to discriminate also the odor of their egg from the odor of a conspecific egg.

## Materials and methods

### *Study site*

This study was conducted on a small sub-Antarctic island (Ile Verte, 49°51'S, 70°05'E) in the Kerguelen Archipelago in October-December 2015. The blue petrel is a common burrow-nesting species in this region, and a study colony of about 80 burrows has been followed since 2001 on this island. Burrows are fitted with a closable aperture over the incubating chamber to facilitate capture. During incubation, partners alternate incubation shifts, relieving each other from the nest every 8 to 12 days (Warham, 1996). We performed the experiment on 24 females while they were brooding their single egg. Females were tested between 9 and 21 days after laying the egg (mean  $\pm$  SE:  $17 \pm 1$  days). In blue petrels, laying is highly synchronized (Fugler et al., 1987; Jouventin et al., 1985), and the mean age difference between the two eggs in a given test was  $0 \pm 1$  days (range: -7 to +8 days). All foreign eggs tested ( $n = 21$ ) were brooded by their female parent at the time of the test. This study was performed according to guidelines established by IPEV and CNRS for the ethical treatment of animals and complied with current French regulations.

### *Y-maze experiment*

We presented petrels with a binary choice in a plastic Y-maze made from standard PVC wire. The maze had three symmetrical arms (arm length, 60 cm; width, 12 cm; height, 11 cm). The angle between two arms was  $\sim 120^\circ$ . One arm was used as starting point and was fitted with two trap doors (30 cm apart) to provide a temporary holding compartment for the test bird. The end of each choice arm was equipped with a separate compartment for the odor source (i.e. an egg), also accessible via a trap door to the outside. Eggs were placed onto a small cup made of aluminum foil. A second partition was positioned 20 cm from each end and equipped with a central-processing-unit cooling fan (Akasa®, model: DFS501012M) to provide low-noise and controlled airflow ( $267 \text{ L}\cdot\text{min}^{-1}$ ) through each choice arm. Thus, birds did not have direct access to the egg but received scented air flowing at a constant rate. The maze was washed after each trial with 96% ethanol to remove any

odor residue. The allocation of the own and conspecific egg to either choice arm changed randomly between trials to eliminate possible bias between the choice arms themselves or their relative positions with respect to the colony, shoreline or other environmental features. The observer was not the same person as the one placing the eggs in the maze so that behavior was recorded blind to treatment. Tested eggs and birds were removed from their nest just before the test and were put back into their nest just after the test, so that each egg or bird was away from the nest for less than 25 min. Once returned to the nest after the experiment, the birds immediately resumed warming the egg. Time spent in each arm of the maze was easily assessed by the noise of the bird walking in the maze. Birds that never entered either choice arm and usually sat calmly in the holding compartment were reported as no-choice birds.

Although the inside of the maze was dark, one might argue that birds could potentially see the eggs through the fans. For birds to recognize their own eggs based on color, intraspecific variation in egg coloration would be expected (Kilner, 2006). By contrast, blue petrels lay monomorphic white eggs in dark burrows. A possible impact of acoustic cues on egg recognition seems also unlikely in our experiments carried out during the first half of incubation when embryos do not appear to vocalize (Gottlieb and Vandenberg, 1968; Rumpf and Tzschentke, 2010). We therefore believe that our experiment tested primarily olfactory recognition rather than visual or acoustic recognition.

### *Statistics*

We used binomial tests to assess female choice as defined by the first Y-maze arm visited by the bird. We also used a paired t-test to assess difference between the time spent in the arm containing the own egg and the time spent in the arm containing the foreign egg. We also used Kruskal Wallis tests to determine whether female choice varied with (i) the age of her own egg, and (ii) the age difference between her own egg and the stranger egg. The effects of these two variables were also tested on the difference between the time spent in the arm containing the own egg and the arm containing the foreign egg, using linear models. Tests were performed with the R software (R Development Core Team, 2008). We used two-tailed tests with a significance level set to  $\alpha = 0.05$ .

## **Results and discussion**

When incubating females were given the choice between their own and a foreign egg, 17 out of 24 (71%) made a choice. Among them, 14 females approached their own egg first, while 3 females approached the foreign egg first (binomial test:  $\chi^2 = 7.12$ ,  $P = 0.008$ ; Fig. 1). The average time spent

in the arm containing the own egg was higher than the time spent in the arm containing the foreign egg (mean  $\pm$  SE:  $5.7 \pm 0.9$  min vs.  $2.0 \pm 0.5$  min,  $t_{1,16} = 3.11$ ,  $P = 0.007$ ; Fig. 2).

Recent evidence shows that egg odor can vary with embryo sex, fertility, and development (Costanzo et al., 2016; Webster et al., 2015). However the ability of birds to assess information encoded by egg odor has scarcely ever been investigated. We provide therefore one of the first evidence that a bird species can discriminate between the odor of their egg and the odor of a conspecific egg (see Golücke et al., 2016 for evidence in zebra finches).

This finding raises the question of the adaptive benefits of egg odor discrimination in blue petrels. In several bird species, females lay eggs in the nest of conspecific individuals which then care for the eggs and the offspring (Rohwer and Freeman, 1989). Because incubation and parental care are costly, hosts may have been selected to develop egg recognition and rejection to avoid providing care to foreign eggs (Lyon and Eadie, 2008). Accordingly, in a several species, including American coots (*Fulica americana*) (Lyon, 2003), house sparrows (*Passer domesticus*) (López-de-Hierro and Moreno-Rueda, 2010), royal terns (*Sterna maxima maxima*) (Buckley and Buckley, 1972) and ostriches (*Struthio camelus*) (Bertram, 1979), parents recognize and reject parasitic conspecific eggs.

Conspecific brood parasitism in blue petrels has never been studied in detail. However, every year, a few blue petrel nests (ca. 1% of nests; pers. observations) are occupied by two breeding pairs, the two pairs each laying an egg usually a few days apart while the other pair is foraging at sea, neglecting its egg. Only one individual at a time occupies the nesting burrow, and incubates only one of the eggs. Detailed observation of two 2-egg nests have shown that blue petrel parents do not incubate their own egg exclusively, but rather seem to incubate one randomly, leading to the hatching failure of all eggs of the clutch (pers. observations). Since parasitic eggs apparently fail to hatch, conspecific brood parasitism does not appear to have evolved as a viable strategy to reduce investment in parental care in blue petrels. The few cases of apparent parasitism may rather come from squatter parents that did not manage to secure their own burrow. Brood parasitism being infrequent in blue petrels, its costs may be insufficient at the population level to select for egg rejection (Rothstein, 1990).

After a foraging trip, blue petrels return to the colony at night, locating their burrow using olfaction (Bonadonna et al., 2001). The burrow-derived odor cues that drive blue petrels towards their nest is unknown, although individual olfactory signatures of nest partners may play a role (Bonadonna et al., 2004). However, egg neglect is common in blue petrels (in 46% of the observed changeovers; Chaurand and Weimerskirch, 1994), and returning parents then need to locate an

empty burrow occupied by the egg only. Egg-odor recognition may, therefore, have evolved to increase burrow localization efficiency in this nocturnal species. Alternatively, as part of egg odor probably originates from the nest environment, egg-odor recognition could be a by-product of burrow-odor recognition. Chemical analyses of egg odor in blue petrels are warranted to determine whether egg odor mainly originates from the embryo itself or from transfer of odorous substances by brooding parents and the nest.

Apparent failure to recognize a foreign egg in a natural context despite the ability to do so in an experimental setting may result from differences in egg age. Egg volatiles are known to vary with embryo developmental stage (Webster et al., 2015). While zebra finches discriminate the odor of their own egg from the odor of a stranger egg when eggs are 10 days old, they do not when eggs are 3 days old (Golüke et al., 2016). Egg odors have therefore been suggested to be insufficiently developed shortly after laying to trigger odor-based recognition (Golüke et al., 2016). In blue petrels, when a resident female arrives in a nest just after a squatter female has laid an egg, the odor of the newly-laid eggs may not yet have sufficient intensity or characteristic compounds to trigger egg discrimination. Afterwards, odorants from the parents and the environment may be transferred to the natural and foreign eggs, which then smell alike, leading to parents failing to recognize their own egg. Parents may then learn the developing odor of the two eggs concurrently so that they are not able to recognize their own egg after odor development. These hypotheses are congruent with zebra finches not being able to recognize as stranger a conspecific newly-laid egg that has been placed in their nest for 10-days (Golüke and Caspers, 2016). In our experiments, age differences between the two test eggs did not affect qualitative female choices ( $\chi^2_2 = 1.20$ ,  $P = 0.55$ ) nor the time spent in the arm containing the own vs. the stranger egg ( $F = 0.19$ ,  $P = 0.66$ ).

As a side note, delay after laying the own egg (i.e. egg age) did not affect the time spent in the arm containing the own vs. the stranger egg either ( $F = 0.27$ ,  $P = 0.61$ ), while it seemed to have a marginally non-significant effect on female choice ( $\chi^2_2 = 5.71$ ,  $P = 0.058$ ). This experiment was not designed to address this specific question however, resulting in the sample being inadequate to confidently assess the effect of embryo development stage on odor recognition. Choice experiments carried out over a broader range of times after laying will be necessary to clarify whether egg recognition by females varies with embryo age.

In conclusion, we found that blue petrel females discriminate the odor of their egg from the odor of a conspecific egg. Although this ability does not seem to be used in the context of conspecific brood parasitism in this species, this remains to be confirmed by a more systematic analysis of nests harboring two different breeding pairs. This report may also inspire further studies

on the links between olfactory cues and egg discrimination in rejecting species suffering brood parasitism.

### **Acknowledgements**

We thank Joris Laborie for his help during fieldwork.

**Competing interests:** No competing interests declared.

**Author contributions:** SL designed the experiment, SL and VB carried out field work, SL analyzed the data and drafted the manuscript, and VB and FB revised the manuscript.

**Funding:** This work was supported by the Institut Polaire Français Paul-Emile Victor (IPEV, Program no. 354 to F.B.), and by a PDOC grant from the Agence Nationale de la Recherche (no. ANR-13-PDOC-0002 to S.L.).



## References

- Amo, L., Avilés, J. M., Parejo, D., Peña, A., Rodríguez, J. and Tomás, G.** (2012a). Sex recognition by odour and variation in the uropygial gland secretion in starlings. *J. Anim. Ecol.* **81**, 605-613.
- Amo, L., López-Rull, I., Pagán, I. and Garcia, C. M.** (2012b). Male quality and conspecific scent preferences in the house finch, *Carpodacus mexicanus*. *Anim. Behav.* **84**, 1483-1489.
- Balthazart, J. and Schoffeniels, E.** (1979). Pheromones are involved in the control of sexual-behavior in birds. *Naturwissenschaften* **66**, 55-56.
- Bertram, B. C.** (1979). Ostriches recognise their own eggs and discard others. *Nature*.
- Bonadonna, F. and Nevitt, G. A.** (2004). Partner-specific odor recognition in an Antarctic seabird. *Science* **306**, 835-835.
- Bonadonna, F., Spaggiari, J. and Weimerskirch, H.** (2001). Could osmotaxis explain the ability of blue petrels to return to their burrows at night? *J. Exp. Biol.* **204**, 1485-1489.
- Bonadonna, F., Villafane, M., Bajzak, C. and Jouventin, P.** (2004). Recognition of burrow's olfactory signature in blue petrels, *Halobaena caerulea*: an efficient discrimination mechanism in the dark. *Anim. Behav.* **67**, 893-898.
- Buckley, P. and Buckley, F.** (1972). Individual egg and chick recognition by adult royal terns (*Sterna maxima maxima*). *Anim. Behav.* **20**, 457-IN1.
- Caro, S. P., Balthazart, J. and Bonadonna, F.** (2015). The perfume of reproduction in birds: Chemosignaling in avian social life. *Horm. Behav.* **68**, 25-42.
- Caspers, B. A., Gagliardo, A. and Krause, E. T.** (2015). Impact of kin odour on reproduction in zebra finches. *Behav. Ecol. Sociobiol.* **69**, 1827-1833.
- Chaurand, T. and Weimerskirch, H.** (1994). Incubation routine, body mass regulation and egg neglect in the blue petrel *Halobaena caerulea*. *Ibis* **136**, 285-290.
- Coffin, H., Watters, J. and Mateo, J.** (2011). Odor-based recognition of familiar and related conspecifics: A first test conducted on captive Humboldt penguins (*Spheniscus humboldti*). *PLoS ONE* **6(9)**, e25002.
- Costanzo, A., Panseri, S., Giorgi, A., Romano, A., Caprioli, M. and Saino, N.** (2016). The Odour of Sex: Sex-Related Differences in Volatile Compound Composition among Barn Swallow Eggs Carrying Embryos of Either Sex. *PLoS one* **11**, e0165055.
- Fugler, S., Hunter, S., Newton, I. and Steele, W.** (1987). Breeding Biology of Blue-Petrels *Halobaena caerulea* at the Prince Edward Islands. *Emu* **87**, 103-110.
- Golüke, S. and Caspers, B. A.** (2016). Female zebra finches smell their eggs. In *16th congress of the International Society for Behavioral Ecology*. Exeter, UK.
- Golüke, S., Dörrenberg, S., Krause, E. T. and Caspers, B. A.** (2016). Female zebra finches smell their eggs. *PLoS one* **11**, e0155513.
- Gottlieb, G. and Vandenbergh, J. G.** (1968). Ontogeny of vocalization in duck and chick embryos. *J. Exp. Zool.* **168**, 307-325.
- Hirao, A., Aoyama, M. and Sugita, S.** (2009). The role of uropygial gland on sexual behavior in domestic chicken *Gallus gallus domesticus*. *Behav. Process.* **80**, 115-120.
- Jouventin, P., Mougin, J.-L., Stahl, J.-C. and Weimerskirch, H.** (1985). Comparative biology of the burrowing petrels of the Crozet Islands.
- Kilner, R.** (2006). The evolution of egg colour and patterning in birds. *Biological Reviews* **81**, 383-406.
- Leclaire, S., Merckling, T., Raynaud, C., Mulard, H., Bessi re, J. M., Lhuillier, E., Hatch, S. A. and Danchin, E.** (2012). Semiochemical compounds of preen secretion reflect genetic make-up in a seabird species. *Proc. R. Soc. B.* **279**, 1185-1193.

**Leclaire, S., van Dongen, W. F., Voccia, S., Merklings, T., Ducamp, C., Hatch, S. A., Blanchard, P., Danchin, É. and Wagner, R. H.** (2014). Preen secretions encode information on MHC similarity in certain sex-dyads in a monogamous seabird. *Sci. Reports* **4**.

**López-de-Hierro, M. D. G. and Moreno-Rueda, G.** (2010). Egg-spot pattern rather than egg colour affects conspecific egg rejection in the house sparrow (*Passer domesticus*). *Behav. Ecol. Sociobiol.* **64**, 317-324.

**Lyon, B. E.** (2003). Egg recognition and counting reduce costs of avian conspecific brood parasitism. *Nature* **422**, 495-499.

**Lyon, B. E. and Eadie, J. M.** (2008). Conspecific brood parasitism in birds: a life-history perspective. *Annual Review of Ecology, Evolution, and Systematics*, 343-363.

**Mardon, J. and Bonadonna, F.** (2009). Atypical homing or self-odour avoidance? Blue petrels (*Halobaena caerulea*) are attracted to their mate's odour but avoid their own. *Behav. Ecol. Sociobiol.* **63**, 537-542.

**Mardon, J., Saunders, J. R. and Bonadonna, F.** (2011). From preen secretions to plumage: the chemical trajectory of blue petrels' *Halobaena caerulea* social scent. *J. Avian Biol.* **42**, 29-38.

**Mardon, J., Saunders, S. M., Anderson, M. J., Couchoux, C. and Bonadonna, F.** (2010). Species, gender, and identity: Cracking petrels' sociochemical code. *Chem. Senses* **35**, 309-321.

**Martín-Vivaldi, M., Soler, J. J., Peralta-Sánchez, J. M., Arco, L., Martín-Platero, A. M., Martínez-Bueno, M., Ruiz-Rodríguez, M. and Valdivia, E.** (2014). Special structures of hoopoe eggshells enhance the adhesion of symbiont-carrying uropygial secretion that increase hatching success. *J. Anim. Ecol.* **83**, 1289-1301.

**R Development Core Team.** (2008). R: A language and environment for statistical computing. Vienna, Austria: R Foundation for Statistical Computing.

**Rohwer, F. C. and Freeman, S.** (1989). The distribution of conspecific nest parasitism in birds. *Can. J. Zool.* **67**, 239-253.

**Rothstein, S. I.** (1990). A model system for coevolution: avian brood parasitism. *Annu. Rev. Ecol. Syst.*, 481-508.

**Rumpf, M. and Tzschentke, B.** (2010). Perinatal acoustic communication in birds: Why do birds vocalize in the egg. *Open Ornithol. J.* **3**, 141-149.

**Soler, J. J. and Møller, A. P.** (1996). A comparative analysis of the evolution of variation in appearance of eggs of European passerines in relation to brood parasitism. *Behav. Ecol.* **7**, 89-94.

**Spottiswoode, C. N. and Stevens, M.** (2010). Visual modeling shows that avian host parents use multiple visual cues in rejecting parasitic eggs. *Proc. Natl. Acad. Sci. U.S.A.* **107**, 8672-8676.

**Warham, J.** (1996). The behaviour, population biology and physiology of the petrels. London, UK: Academic Press.

**Webster, B., Hayes, W. and Pike, T. W.** (2015). Avian egg odour encodes information on embryo sex, fertility and development. *PloS one* **10**, e0116345.

**Whittaker, D. J., Gerlach, N. M., Soini, H. A., Novotny, M. V. and Ketterson, E. D.** (2013). Bird odour predicts reproductive success. *Anim. Behav.* **86**, 697-703.

**Whittaker, D. J., Richmond, K. M., Miller, A. K., Kiley, R., Burns, C. B., Atwell, J. W. and Ketterson, E. D.** (2011). Intraspecific preen oil odor preferences in dark-eyed juncos (*Junco hyemalis*). *Behav. Ecol.* **22**, 1256-1263.

**Whittaker, D. J., Soini, H. A., Atwell, J. W., Hollars, C., Novotny, M. V. and Ketterson, E. D.** (2010). Songbird chemosignals: volatile compounds in preen gland secretions vary among individuals, sexes, and populations. *Behav. Ecol.* **21**, 608-614.

**Yom-Tov, Y.** (2001). An updated list and some comments on the occurrence of intraspecific nest parasitism in birds. *Ibis* **143**, 133-143.

## Figures

**Figure 1:** Y-maze tests where blue petrel females ( $n = 17$ ) were challenged to choose either the odor of their own egg or the odor of a conspecific egg. Percentage of females who chose first the arm containing the odor of their own egg or the conspecific egg is shown. Binomial test:  $\chi^2 = 7.12$ ,  $P = 0.008$ .

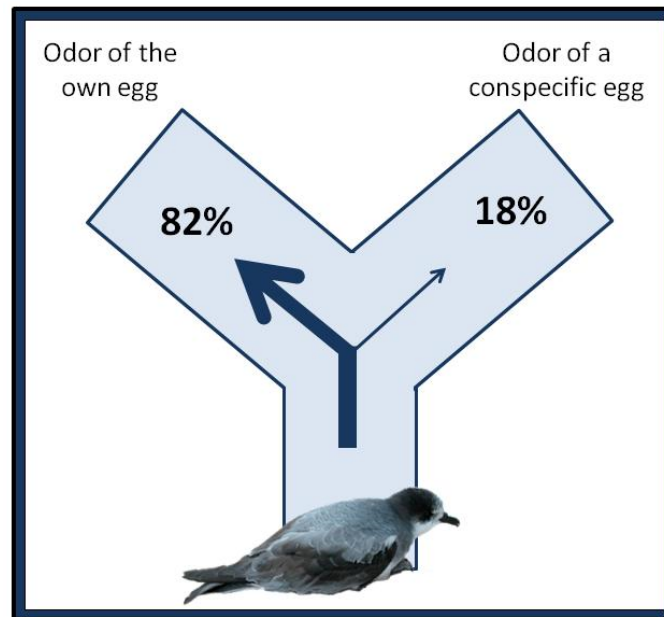

**Figure 2:** Time spent by each blue petrel female ( $n = 17$ ) in the arm containing the odor of their egg or the odor of a conspecific egg. Mean  $\pm$  SE is also shown. T-test:  $t_{1,16} = 3.11$ ,  $P = 0.007$ .

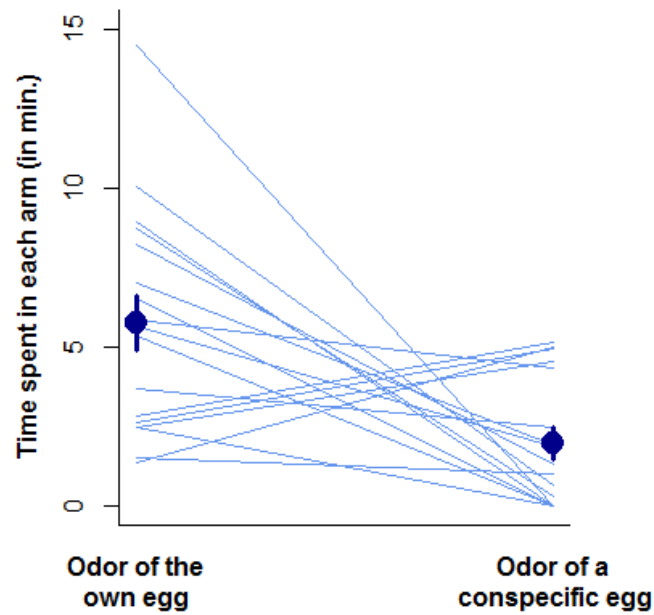

Source: https://cob.silverchair.com/jeb/article-pdf/doi/10.1242/jeb.163899/2040928/jeb_163899v1.pdf
